# Supplementary material for: Insulin promoter DNA methylation correlates negatively with insulin gene expression and positively with HbA1c levels in human pancreatic islets
Source: PubMed Central journal article supplement — Diabetologia. 2010 Nov 23;54(2):360–7. doi: 10.1007/s00125-010-1967-6 (PMC3017313; doi:10.1007/s00125-010-1967-6), 2010-11-23
Supplement: 125_2010_1967_MOESM1_ESM.pdf [file 125_2010_1967_MOESM1_ESM.pdf]

## Electronic supplementary material

**ESM Table 1** Primer sequences and positions in relation to the transcription start site for the assays used to analyse DNA methylation of the human and rat insulin gene by EpiTYPER and Pyrosequencing

| Position                | Direction  | Sequence (5' to 3')                                        |
|-------------------------|------------|------------------------------------------------------------|
| -2407-1984 <sup>a</sup> | Reverse    | cagtaatac gactcactatagggagaaggctCCCCCTACAAAATACCCTAAA ACTA |
|                         | Forward    | aggaagagagGGGAGTAGGGGTATAAATTGTGTT                         |
| -2008-1736 <sup>a</sup> | Reverse    | cagtaatac gactcactatagggagaaggctAACTTCCTAAAAACTCACAACCCTT  |
|                         | Forward    | aggaagagagTAGTTTTAGGGTATTTTGTAGGGGG                        |
| -1759-1445 <sup>a</sup> | Reverse    | cagtaatac gactcactatagggagaaggctCTACACACACCCAACCTTAACTCT   |
|                         | Forward    | aggaagagagAGGGTTGTGAGTTTTTAGGAAGTTT                        |
| -1318-874 <sup>a</sup>  | Reverse    | cagtaatac gactcactatagggagaaggctTACCTTAAAACAACAACCCCAACTA  |
|                         | Forward    | aggaagagagTTTGTTTTTGGTGTTAAGAGGTAGG                        |
| -263+110 <sup>a</sup>   | Reverse    | cagtaatac gactcactatagggagaaggctAACTAAAACCTAAAATCCAACCACC  |
|                         | Forward    | aggaagagagTAGTTGTGAGTAGGGATAGGTTTGG                        |
| -241-171 <sup>a</sup>   | Reverse    | Biotin-ACAATTTCCCAACCATTTCCTAATACTAA                       |
|                         | Forward    | TGGAGATATTTGTTTTTAGTTGTGAGTAG                              |
|                         | Sequencing | AGTTGTGAGTAGGGAT                                           |
| -1206-835 <sup>b</sup>  | Reverse    | cagtaatac gactcactatagggagaaggctACCTTCTCAACCTCCACTTAAAAT   |
|                         | Forward    | aggaagagagGGTTTTTTGGTTTTTTTATGGTTTT                        |
| -245+118 <sup>b</sup>   | Reverse    | cagtaatac gactcactatagggagaaggctAAAAAACTTCCACCAAATAAAAACC  |
|                         | Forward    | aggaagagagATAGTAAAGTTTAGGGGTAGGGGG                         |

Lowercase denotes sequence tags necessary for the EpiTyper protocol

<sup>a</sup>Human insulin promoter

<sup>b</sup>Rat insulin promoter
